# Supplementary material for: Improvement of Biomass and Phycoerythrin Production by a Strain of Rhodomonas sp. Isolated from the Tunisian Coast of Sidi Mansour
Source: MDPI journal article supplement (doi:10.3390/biom12070885), 2022-06-24
Supplement: s1 [file s1]

**Table S1.** Nutrients composition of the different growth media used.

| <b>Culture Media</b>        | <b>Compositions</b>                                                                                                                                                                                                                                                                                                                                                                                                                                                                                                                                                                                                                                                             | <b>References</b>                                                                                                                                                                                                                                                                                                             |
|-----------------------------|---------------------------------------------------------------------------------------------------------------------------------------------------------------------------------------------------------------------------------------------------------------------------------------------------------------------------------------------------------------------------------------------------------------------------------------------------------------------------------------------------------------------------------------------------------------------------------------------------------------------------------------------------------------------------------|-------------------------------------------------------------------------------------------------------------------------------------------------------------------------------------------------------------------------------------------------------------------------------------------------------------------------------|
| <b>Pm medium</b>            | 15 g/L NaCl, 1.7 g/L NaNO <sub>3</sub> , 0.9 g/L K <sub>2</sub> HPO <sub>4</sub> , 7.2 g/L MgSO <sub>4</sub> , 7H <sub>2</sub> O, 1.55 g/L CaCl <sub>2</sub> , 2H <sub>2</sub> O and 1 mL/L trace metal solution composed of 0.15 g/L MnSO <sub>4</sub> , H <sub>2</sub> O, 0.015 g/L (NH <sub>4</sub> ) <sub>6</sub> Mo <sub>7</sub> O <sub>24</sub> , 4H <sub>2</sub> O, 0.015 g/L CoSO <sub>4</sub> , 7H <sub>2</sub> O, 0.05 g/L CuSO <sub>4</sub> , 5H <sub>2</sub> O, 0.25 g/L ZnSO <sub>4</sub> , 7H <sub>2</sub> O and 10 g/L Fer-EDTA and 1 mL/L of vitamin solution prepared in pure water and containing 0.01 g/L Vitamin B12, 0.025 g/L Thiamin and 0.04 g/L Biotin | Soanen N, Da Silva E, Gardarin C, Michaud P, Laroche C. Improvement of exopolysaccharide production by <i>Porphyridium marinum</i> . Bioresour Technol. 2016 Aug;213:231-238. doi: 10.1016/j.biortech.2016.02.075. Epub 2016 Feb 26. PMID: 26944455.                                                                          |
| <b>Artificial sea water</b> | 24.53g/L of NaCl; 5.2 g/L of MgCl <sub>2</sub> ; ;4.09 g/L of Na <sub>2</sub> SO <sub>4</sub> ;1.54 g/L of CaCl <sub>2</sub> , 2H <sub>2</sub> O; 0.695 g/L of KCL; 0.2g/L of NaHCO <sub>3</sub> ; 0.101 g/L of KBr; 0.027 g/L of H <sub>3</sub> BO <sub>3</sub> ;0.42 g/L of SrCl <sub>2</sub> , 6H <sub>2</sub> O; 0.03 g/L of NaF.                                                                                                                                                                                                                                                                                                                                           | Yeh, C. P., Tsai, K. C., & Huang, J. Y. (2020) Influence of Chloride Concentration on Stress Corrosion Cracking and Crevice Corrosion of Austenitic Stainless Steel in Saline Environments. Materials (Basel, Switzerland), 13(24), 5640. <a href="https://doi.org/10.3390/ma13245640">https://doi.org/10.3390/ma13245640</a> |
| <b>Standard F/2 medium</b>  | 150 mg of NaNO <sub>3</sub> ; 10 mg of NaH <sub>2</sub> PO <sub>4</sub> , H <sub>2</sub> O; 10 mg of Fe sequestrene; 30-60 mg of Na <sub>2</sub> SiO <sub>4</sub> , 9H <sub>2</sub> O; Vitamins ( 0.2 mg of thiamine, HCL; 1 µg of biotin; 1µg of B <sub>12</sub> ) Trace metal (0.0196 mg of CuSO <sub>4</sub> , 5H <sub>2</sub> O, 0.044 mg of ZnSO <sub>4</sub> , 7H <sub>2</sub> O; 0.02 mg of CoCl <sub>2</sub> , 6H <sub>2</sub> O; 0.360 mg MnCl <sub>2</sub> , 4H <sub>2</sub> O; 0.0126 mg of Na <sub>2</sub> MoO <sub>4</sub> , 2H <sub>2</sub> O); Sea water (to 1 liter)                                                                                            | Guillard, R.R.L. and J.H. Ryther. (1962) Studies on marine planktonic diatoms I, Cyclotella nana Hustedt and Detonula confervaceae (Cleve) Gran. Can. J. Microbi~8: 229-239.                                                                                                                                                  |

|                     |                                                                                                                                                                                                                                                                                                                                                                                                                                                                                                                                                                                                                                                                                                                                                                                                 |                                                                                                                                                                                                                                                                           |
|---------------------|-------------------------------------------------------------------------------------------------------------------------------------------------------------------------------------------------------------------------------------------------------------------------------------------------------------------------------------------------------------------------------------------------------------------------------------------------------------------------------------------------------------------------------------------------------------------------------------------------------------------------------------------------------------------------------------------------------------------------------------------------------------------------------------------------|---------------------------------------------------------------------------------------------------------------------------------------------------------------------------------------------------------------------------------------------------------------------------|
| <b>Modified F/2</b> | 27 g/L of NaCl; 5.6 g of MgCl <sub>2</sub> ·6H <sub>2</sub> O; 1.12 g/L of CaCl <sub>2</sub> ; 1 g/L of KNO <sub>3</sub> ; 0.07 g/L of KH <sub>2</sub> PO <sub>4</sub> ; 0.04 g/L of NaHCO <sub>3</sub> ; 3.22 g/L of MgSO <sub>4</sub> ·H <sub>2</sub> O; 0.075 g/L of NaNO <sub>3</sub> ; 0.005 g/L of NaH <sub>2</sub> PO <sub>4</sub> ; Metal Solution and Vitamin Solution.                                                                                                                                                                                                                                                                                                                                                                                                                | Guillard RRL (1975) Culture of Phytoplankton for Feeding Marine Invertebrates. In: Smith WL, Chanley MH (eds) Culture of Marine Invertebrate Animals: Proceedings — 1st Conference on Culture of Marine Invertebrate Animals Greenport. Springer US, Boston, MA, pp 29–60 |
| <b>BG-11 medium</b> | 1.5 g/L of NaNO <sub>3</sub> ; 0.04 g/L of K <sub>2</sub> HPO <sub>4</sub> ·3H <sub>2</sub> O; 0.075 g/L of MgSO <sub>4</sub> ·7H <sub>2</sub> O; 0.002 g/L of Na <sub>2</sub> CO <sub>3</sub> ; 0.036 g/L of CaCl <sub>2</sub> ·2H <sub>2</sub> O; 0.058 g/L of Na <sub>2</sub> SiO <sub>3</sub> ·9H <sub>2</sub> O; 0.001 g/L of EDTA; 0.006 g/L of citric acid; 0.006 g/L of Fe citrate and 1 ml of metal solution prepared in pure water and containing 2.86 g/L of H <sub>3</sub> BO <sub>3</sub> ; 1.81 g/L of MnCl <sub>2</sub> ·4H <sub>2</sub> O; 0.222 g/L ZnSO <sub>4</sub> ·7H <sub>2</sub> O; 0.391 g/L Na <sub>2</sub> MoO <sub>4</sub> ·2H <sub>2</sub> O; 0.079 g/L of CuSO <sub>4</sub> ·5H <sub>2</sub> O; 0.0494 g/L of Co(NO <sub>3</sub> ) <sub>2</sub> ·6H <sub>2</sub> O | Allen MM (1968) SIMPLE CONDITIONS FOR GROWTH OF UNICELLULAR BLUE-GREEN ALGAE ON PLATES. J Phycol 4:1–4.<br><a href="https://doi.org/10.1111/j.1529-8817.1968.tb04667.x">https://doi.org/10.1111/j.1529-8817.1968.tb04667.x</a>                                            |

**Table S2.** Partial sequence of 18S rRNA gene of the isolated *Rhodomonas* sp.

| <b>18S partial sequence</b>                                                                                                                                                                                                                                                                                                                                                                                                                                                                                                                                                                                                                                                                                                                                                                                                                                                                                         |
|---------------------------------------------------------------------------------------------------------------------------------------------------------------------------------------------------------------------------------------------------------------------------------------------------------------------------------------------------------------------------------------------------------------------------------------------------------------------------------------------------------------------------------------------------------------------------------------------------------------------------------------------------------------------------------------------------------------------------------------------------------------------------------------------------------------------------------------------------------------------------------------------------------------------|
| >ATTCAAATCCAGGATATCGTTTATTTGACGGTCCAAAAAACTACATGGATAACCGTAGTATTCTACTGCTA<br>ATACATGCCCCAAAGGTCCGACTTACGAAGGACTGTATTTATTAGATTCCAAGCCACATTTCTGGTGATTCATA<br>ATAACTTCTCGAACCACAGCCCTCGCGGTGGTGGTGATTCAATTTCTGCCCTATCAACTTTCGATGGT<br>AGGATAGAGGCCTACCATGGTTTTAACGGGTGACGGAAAAATTAGGGTTCGATTCCGGAGAGGGAGCCTGA<br>AAGACGGCTACCACATCCAAGGAAGGCAGCAGGCGCGCAATTACCCAATCCCGACTCGGGGGAGGTAGTG<br>ACAATAAATAACATCCGGGGCTAACCCTTGTTATTGGATGACACCATTAAATCCCTTTCGAGAACAATTA<br>AGGGCAAGTCTGGTGCCGCACCCGCGGAATCCCGCTCCAAAAGCGTATATAAAGTTGTCGCATTAAAAACT<br>CGTATCCGATGCCGGCTCGGGAGGTGCCGCCTTGGTCGAAGGCTGCCGGTCCTATCTCCTGGGATCCTATC<br>ACTTAAGTGAAGGAGGGACCAGGCTTTCTTTGAAAATTAAATGTCAGCGGCCACCTGGACCTACCTGGAAA<br>GGAAAGATTTTGTCTATTGTGTTGGGCCCAATAGTAACGGACGTTGGCCTATTGTGTGCAAGTAATCTGATA<br>CGAAAACTTCGCAACTCCGAGGTTCTAGTACACATGATGGTAGAGAACATCCTGAGTATCATAATGGGCAA<br>GATAGGACCTGGGGCCTGGGCGTCGAACCCATTTGTGGTCCTAGTAACTAGCACATAA |
